# Supplementary material
Source: PubMed Central journal article supplement (PMC7723336)

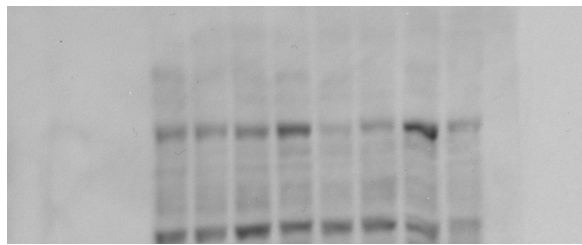

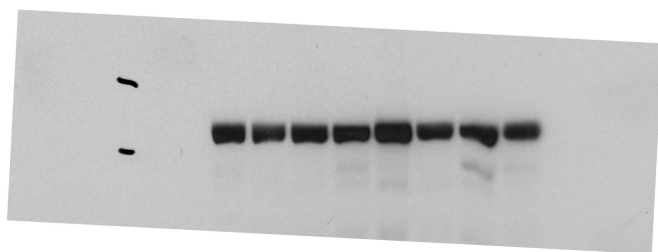

Supplement: NIHMS1611189-supplement-Source_Data.pdf [file NIHMS1611189-supplement-Source_Data.pdf]
